# Supplementary material for: A novel simple immunoassay for quantification of blood anti-NMDAR1 autoantibodies
Source: PeerJ. 2025 Mar 31;13:e19212. doi: 10.7717/peerj.19212 (PMC11967420; doi:10.7717/peerj.19212)
Supplement: Supplemental Information 2 — Anti-NMDAR1 autoantibodies were quantified using immunohistochemistry on three different subregions of hippocampal CA1 st oriens. The same serum samples were also quantified using our new immunoassay with triplications. [file peerj-13-19212-s002.xlsx]

## Sheet: Sheet1
	Immunohistochemical Quantification							Immunoassay Quantification
Immunization	Mouse ID	Quantification-1	Quantification-2	Quantification-3	Mean			Mouse ID	Quantification-1	Quantification-2	Quantification-3	Mean
P2	345	0.341	0.334	0.327	0.334			345	59775	64045	59165	60995
P2	346	0.299	0.293	0.287	0.293			346	39903	37579	38741	38741
P2	347	0.243	0.238	0.233	0.238			347	25471	26221	23224	24972
P2	348	0.22	0.216	0.212	0.216			348	15689	15537	14470	15232
P2	349	0.231	0.226	0.221	0.226			349	18981	19568	20155	19568
P2	350	0.197	0.193	0.189	0.193			350	13183	12676	12169	12676
P2	351	0.403	0.395	0.387	0.395			351	90164	87432	95629	91075
P2	352	0.381	0.374	0.367	0.374			352	86880	86003	90391	87758
P2	353	0.35	0.343	0.336	0.343			353	63629	65519	59849	62999
P2	355	0.479	0.47	0.461	0.47			355	213967	216173	231614	220585
P2	373	0.241	0.236	0.231	0.236			373	22996	24932	24690	24206
P2	374	0.375	0.368	0.361	0.368			374	75482	77769	75482	76244
P2	375	0.31	0.304	0.298	0.304			375	55342	57090	62333	58255
P2	376	0.19	0.186	0.182	0.186			376	9199	8739	9659	9199
P2	377	0.418	0.41	0.402	0.41			377	180797	173565	188029	180797
P2	378	0.169	0.166	0.163	0.166			378	2047	1907	2067	2007
P2	379	0.275	0.27	0.265	0.27			379	34921	32846	35958	34575
P2	380	0.334	0.327	0.32	0.327			380	61343	56669	57254	58422
C	333	0.104	0.111	0.107	0.107
C	334	0.105	0.103	0.109	0.105
C	335	0.105	0.117	0.104	0.108
C	336	0.118	0.101	0.119	0.113
C	337	0.117	0.118	0.12	0.118
C	338	0.108	0.111	0.112	0.11
C	340	0.106	0.11	0.102	0.106
C	341	0.115	0.111	0.111	0.112
C	342	0.109	0.102	0.112	0.108
C	343	0.112	0.12	0.107	0.113
C	344	0.107	0.101	0.109	0.106
C	361	0.112	0.105	0.104	0.107
C	362	0.116	0.118	0.113	0.115
C	363	0.105	0.119	0.119	0.114
C	364	0.113	0.109	0.114	0.112
C	365	0.104	0.109	0.106	0.106
C	366	0.112	0.113	0.115	0.113
C	367	0.12	0.101	0.117	0.113
C	368	0.116	0.109	0.12	0.115
