# Supplementary material for: A novel simple immunoassay for quantification of blood anti-NMDAR1 autoantibodies
Source: PeerJ. 2025 Mar 31;13:e19212. doi: 10.7717/peerj.19212 (PMC11967420; doi:10.7717/peerj.19212)
Supplement: Supplemental Information 3 — Raw data of the cross species quantifications between mouse and human. [file peerj-13-19212-s003.xlsx]

## Sheet: Sheet1
Cross-Species ImmunoAssay of Anti-NMDAR1 Autoantibody in Serum of Mice and Humans
				Mouse					Mouse					Human	RLU
				Immunized Control	RLU				Immunized with P2	RLU				H1	4018
				C1	1458				P1	62825				H2	4142
				C2	1198				P2	37966				H3	4372
				C3	6670				P3	24722				H4	3396
				C4	1385				P4	15841				H5	6442
				C5	1503				P5	19372				H6	3564
				C6	1644				P6	12803				H7	3634
				C7	1342				P7	92897				H8	5885
				C8	1439				P8	90405				H9	2698
				C9	1795				P9	61739				H10	5433
				C10	1688				P10	213970				H11	4601
				C11	1231				P11	24692				H12	4792
				C12	1528				P12	78531				H13	2136
				C13	2213				P13	58838				H14	4161
				C14	1757				P14	9567				H15	3509
				C15	1351				P15	177181				H16	2875
				C16	1531				P16	2087				H17	4442
				C17	1662				P17	33884				H18	4255
				C18	1680				P18	57838				H19	12775
														H20	3388
														H21	3667
														H22	4984
														H23	4634
														H24	4183
														H25	4329
														H26	11637
														H27	5184
														H28	5153
														H29	4490
														H30	4349
														H31	7277
														H32	5001
														H33	5547
														H34	4572
														H35	5637
														H36	4878
														H37	7435
														H38	4542
														H39	2524
														H40	3313
														H41	5418
														H42	5996
														H43	2338
														H44	9500
														H45	4142
														H46	7081
														H47	3695
														H48	4302
														H49	3701
														H50	4363
														H51	7349
														H52	8103
														H53	2240
														H54	4602
														H55	7295
														H56	5689
														H57	3692
														H58	6897
														H59	3209
														H60	4206
														H61	5431
														H62	2476
														H63	5031
														H64	3330
														H65	3381
														H66	2496
														H67	16649
														H68	4783
														H69	2695
														H70	4630
														H71	5322
														H72	2852
														H73	5043
														H74	3156
														H75	4685
														H76	3590
														H77	3915
														H78	3976
														H79	3965
														H80	7013
														H81	5470
														H82	2804
														H83	6410
														H84	5832
														H85	3795
														H86	8525
														H87	6849
														H88	2518
														H89	5291
														H90	5021
														H91	3240
														H92	41873
														H93	4039
														H94	3765
														H95	2464
														H96	3650
														H97	4897
														H98	4930
														H99	3463
														H100	7539
														H101	6027
														H102	4775
														H103	5337
														H104	5039
														H105	4628
														H106	12476
														H107	5486
														H108	3021
														H109	5353
														H110	3662
														H111	2778
														H112	5285
														H113	3320
														H114	3944
														H115	8806
														H116	2770
														H117	7472
														H118	5088
														H119	3401
														H120	2384
														H121	18692
														H122	4841
														H123	5189
														H124	4470
														H125	2770
														H126	4810
														H127	13894
														H128	5268
														H129	8975
														H130	4930
														H131	4660
														H132	3391
														H133	4245
														H134	6141
														H135	6083
														H136	3426
														H137	3646
														H138	4986
														H139	2524
														H140	6455
														H141	6333
														H142	6020
														H143	4113
