# Supplementary material for: A novel simple immunoassay for quantification of blood anti-NMDAR1 autoantibodies
Source: PeerJ. 2025 Mar 31;13:e19212. doi: 10.7717/peerj.19212 (PMC11967420; doi:10.7717/peerj.19212)
Supplement: Supplemental Information 4 — Specificity of the quantification of anti-NMDAR1 autoantibodies were validated in both immunized mice and human subjects using both GLUC and NR1-GLUC probes. [file peerj-13-19212-s004.xlsx]

## Sheet: Sheet1
About same amount of the GLUC input between the two probes
		Probe input (RLU)
Control GLUC probe		3156590
NR1-GLUC probe		3329070
				GLUC probe			NR12-GLUC probe
	Species	Immunization		RLU			RLU
	Mouse	C	1	8061		1	37746
	Mouse	C	2	9228		2	34539
	Mouse	C	3	7852		3	30320
	Mouse	C	4	8228		4	35764
	Mouse	C	5	9177		5	25397
	Mouse	C	6	10020		6	23787
	Mouse	C	7	7409		7	34152
	Mouse	P2	8	6925		8	1012621
	Mouse	P2	9	10469		9	1284998
	Mouse	P2	10	7135		10	1115718
	Mouse	P2	11	10682		11	889494
	Mouse	P2	12	9231		12	1379508
	Mouse	P2	13	16106		13	700614
	Mouse	P2	14	14343		14	1005464
	Human		15	16778		15	143745
	Human		16	12501		16	139142
	Human		17	17186		17	72266
	Human		18	15149		18	175722
	Human		19	16205		19	64807
	Human		20	20640		20	506071
	Human		21	23676		21	213548
	Human		22	16131		22	423487
	Human		23	17239		23	134365
	Human		24	14756		24	68428
	Human		25	16443		25	174439
	Human		26	17161		26	282696
	Human		27	15599		27	142393
	Human		28	19722		28	215507
